# Supplementary material for: p16INK4A-deficiency predicts response to combined HER2 and CDK4/6 inhibition in HER2+ breast cancer brain metastases
Source: PubMed Central journal article supplement (PMC8933392; doi:10.1038/s41467-022-29081-2), 2022-03-18
Supplement: 41467_2022_29081_MOESM1_ESM.pdf [file 41467_2022_29081_MOESM1_ESM.pdf]

### RTK/PI3K/PTEN signaling

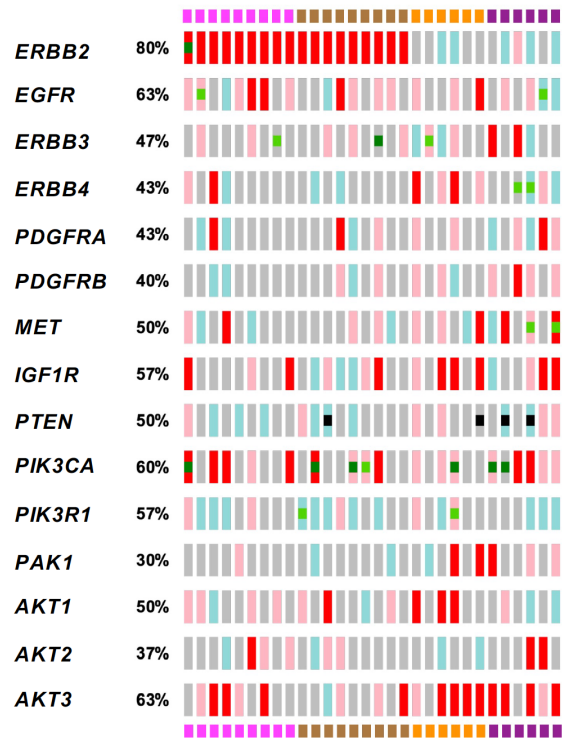

### TP53 signaling pathway

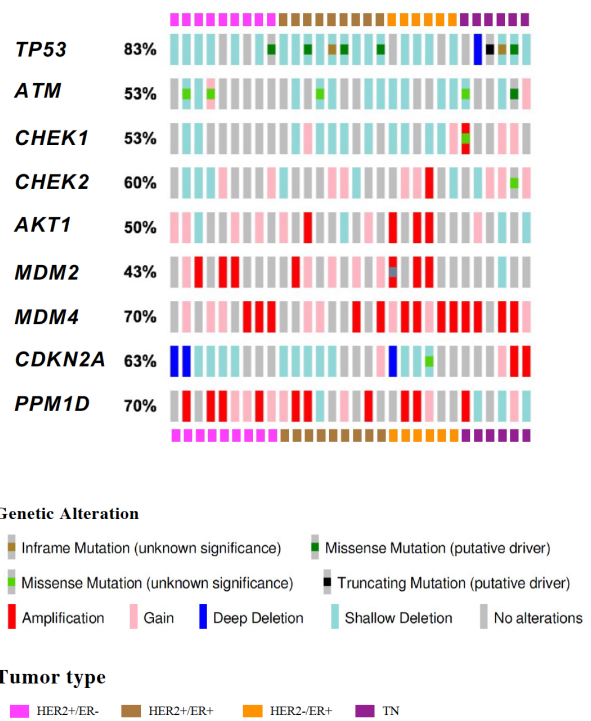

**Genetic Alteration**

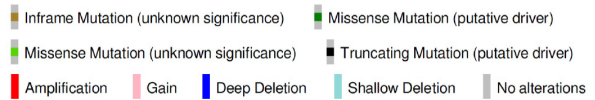

**Tumor type**

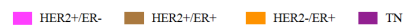

**Supplementary Figure 1.** Genomic analysis of RTK/PI3K/PTEN and TP53 signaling pathways in BCBM PDXs. Mutations and CNV status for each gene across 30 BCBM PDX samples are shown. Source data are provided as a Source Data file.

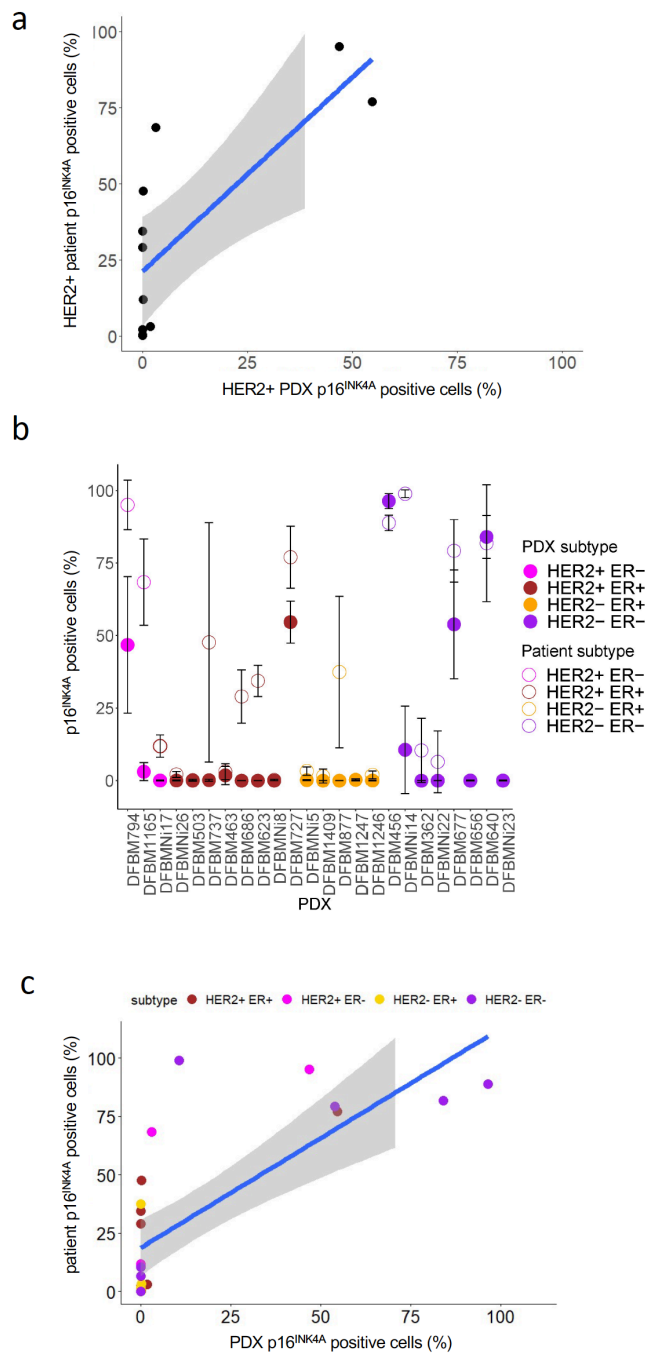

**Supplementary Figure 2.** (a) p16<sup>INK4A</sup> positive cells in HER2+ BCBM PDX tissues are highly correlated with matched HER2+ BCBM patient tissues ( $n = 11$ ,  $r = 0.76$ ,  $p = 0.003$ , Pearson's test of correlation). (b) p16<sup>INK4A</sup> expression by immunohistochemistry in BCBM PDX and matched patient tissues across all subtypes. Mean p16<sup>INK4A</sup> positive cells in PDX tissues (solid circles) was not significantly different compared to matched patient tissues (empty circles). Data are presented as mean values  $\pm$  SD. ( $14.7 \pm 3.42\%$  vs  $32.5 \pm 7.8\%$ ,  $p = 0.07$ ;  $n = 24$ ). (c) Across all subtypes, p16<sup>INK4A</sup> expression by immunohistochemistry in BCBM PDX and matched patient tissues is highly correlated ( $n = 24$ ,  $r = 0.74$ ,  $p = 1.6 \times 10^{-5}$ , Pearson's test of correlation). Source data are provided as a Source Data file.

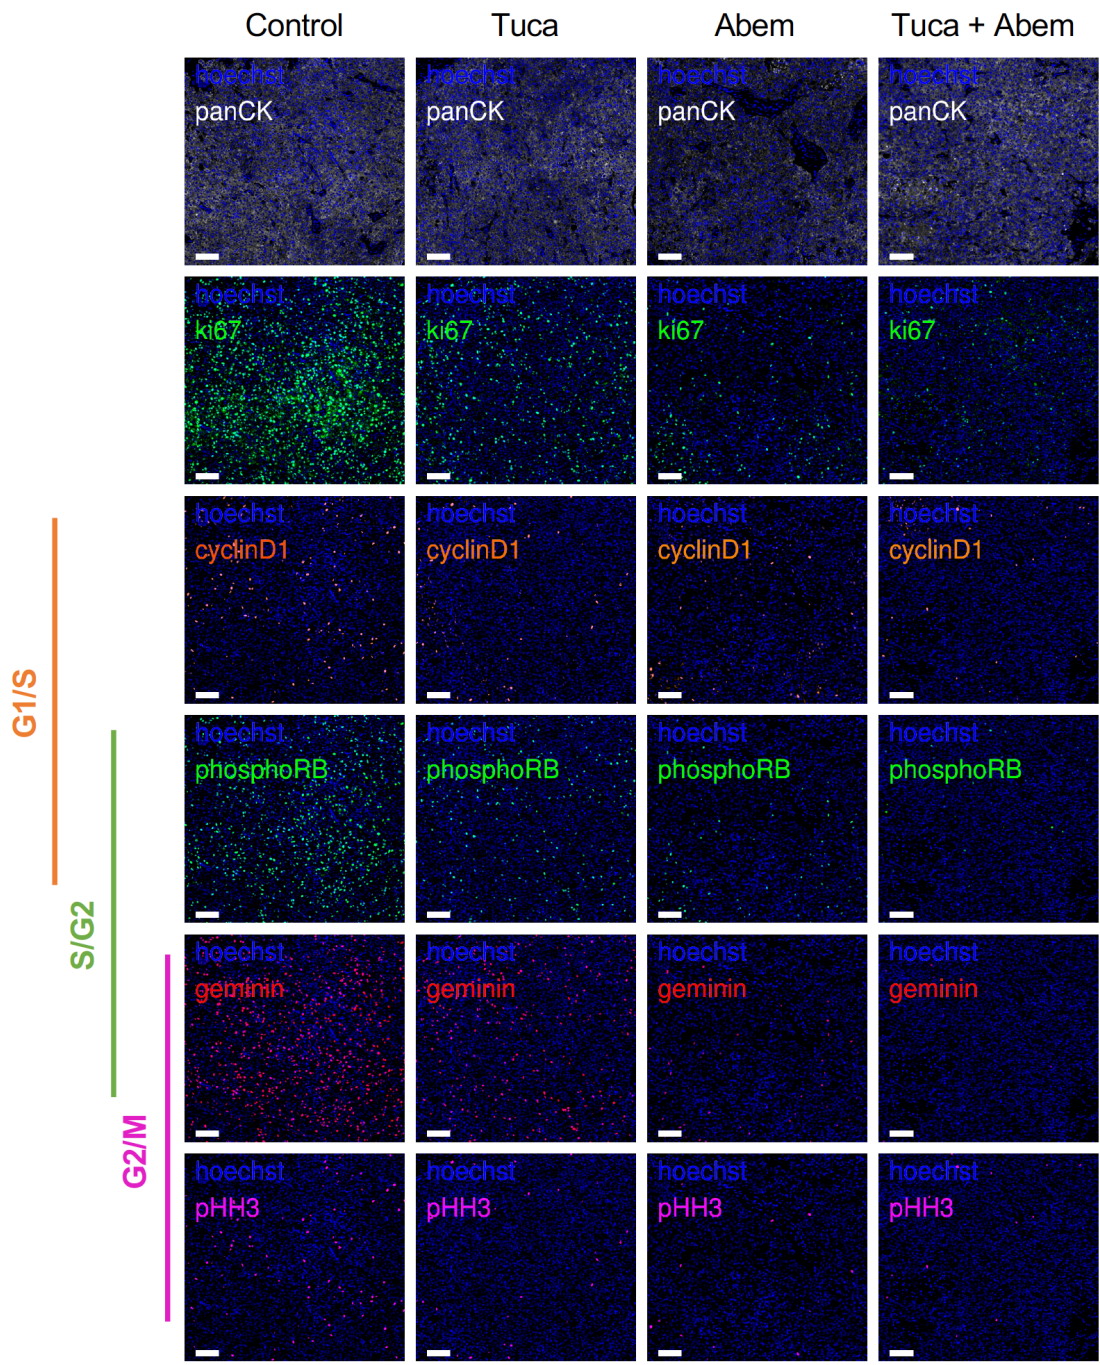

**Supplementary Figure 3.** Multiplexed tissue imaging of cell cycle and proliferation markers reveals that DFBM-355 treated with abemaciclib and tucatinib (as shown in **Figure 2a**) has reduced proliferation (as measured by Ki67) and loss of cell cycle marker expression across all phases (G1/S/G2) compared to monotherapy or control. Whole sections were imaged and representative fields shown. Scale bar = 100  $\mu$ m.

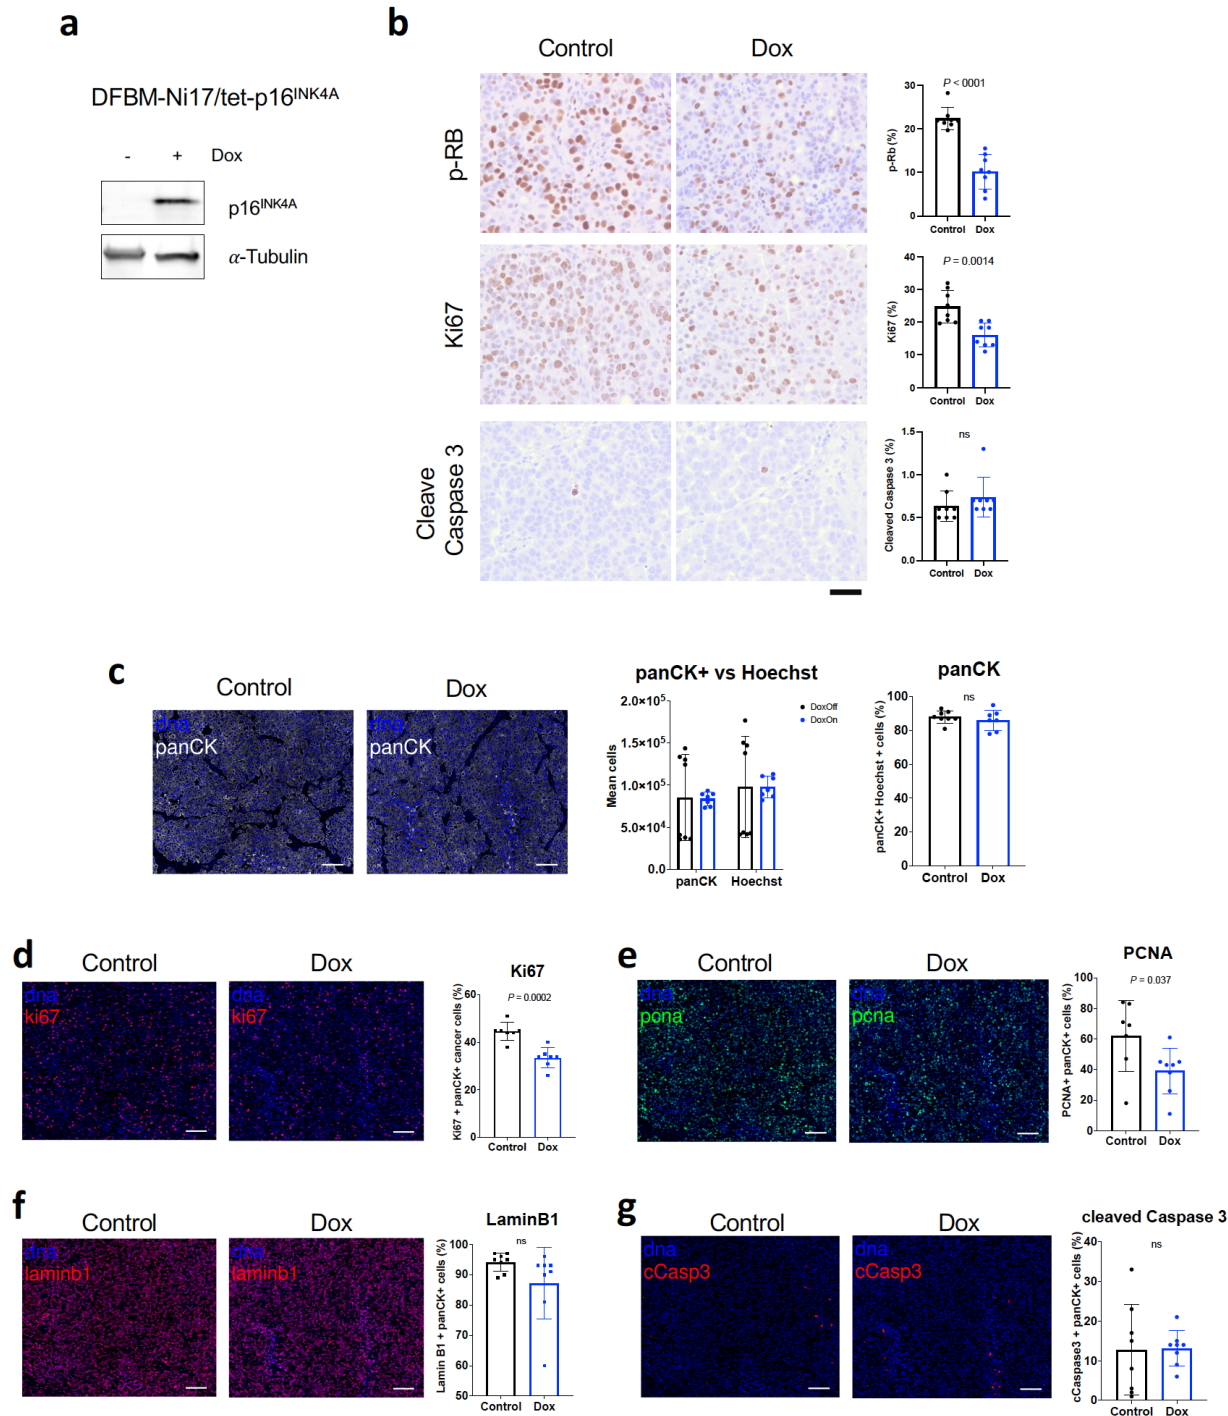

**Supplementary Figure 4.** (a) Western blot analysis of p16<sup>INK4A</sup> expression in DFBM-Ni17/tet-p16<sup>INK4A</sup> cells. Cells were collected after 3 days of treatment with doxycycline (1  $\mu$ g/ml) or vehicle control. Experiment was repeated twice, and representative data are shown. (b) Immunohistochemistry of p-Rb, Ki67 and cleaved Caspase 3 of tumor tissues from DFBM-Ni17/tet-p16<sup>INK4A</sup> after 3 days of doxycycline administration. n = 8 /group. Scale bar, 50  $\mu$ m. Multiplexed tissue imaging of (c) pan Cytokeratin (pan-CK, control, n = 8; Dox, n = 7), (d,e) proliferation (Ki67, n = 7/group; PCNA, control, n = 7; Dox, n = 8), (f) senescence (loss of Lamin B1, n = 7/group; PCNA, control, n = 7; Dox, n = 8), (g) senescence (loss of Lamin B1, n = 7/group; PCNA, control, n = 7; Dox, n = 8).

= 8/group) and **(g)** apoptosis (cleaved Caspase 3, n = 8/group) markers on DFBM-Ni17/tetp16<sup>INK4A</sup> tumor tissues after 3 days of p16<sup>INK4A</sup> induction. Scale bar 100  $\mu$ m. For **b-g**, mean  $\pm$  SD, Unpaired t-test. Source data are provided as a Source Data file.

Supplementary Table 1: List of antibodies used for multiplex immunofluorescence microscopy

| <b>Antibody Target</b> | <b>Source</b>             | <b>Catalog #</b> | <b>RRID</b> | <b>Standard Dilution</b> | <b>Clone Name</b> |
|------------------------|---------------------------|------------------|-------------|--------------------------|-------------------|
| Cyclin D1              | Abcam                     | ab203448         | AB_2890216  | 1:100                    | EPR2241           |
| Geminin                | Santa Cruz                | sc-74456         | AB_1124963  | 1:100                    | F7                |
| Ki67                   | Cell Signaling Technology | 11882S           | AB_2687824  | 1:100                    | D3B5              |
| Lamin B1               | Abcam                     | ab194108         | AB_2889226  | 1:100                    | EPR8985(B)        |
| p16                    | Roche                     | 705-4793         | AB_2833232  | 1:10                     | E6H4              |
| Pan-Cytokeratin        | eBioscience               | 53-9003-82       | AB_1834350  | 1:100                    | ae183             |
| Phospho-Histone H2A.X  | eBioscience               | 53-9865-82       | AB_2574485  | 1:100                    | CR55T33           |
| Phospho-Histone H3     | Cell Signaling Technology | 3475s            | AB_10694639 | 1:100                    | D2C8              |
| Phospho-RB             | Cell Signaling Technology | 4277S            | AB_2797605  | 1:100                    | DB20B12           |
| PCNA                   | Cell Signaling Technology | 8580S            | AB_11178664 | 1:100                    | PC10              |
